# Supplementary material for: Electrical Stimulation Induces Retinal Müller Cell Proliferation and Their Progenitor Cell Potential
Source: MDPI journal article supplement (doi:10.3390/cells9030781), 2020-03-23
Supplement: s1 [file s1]

**A**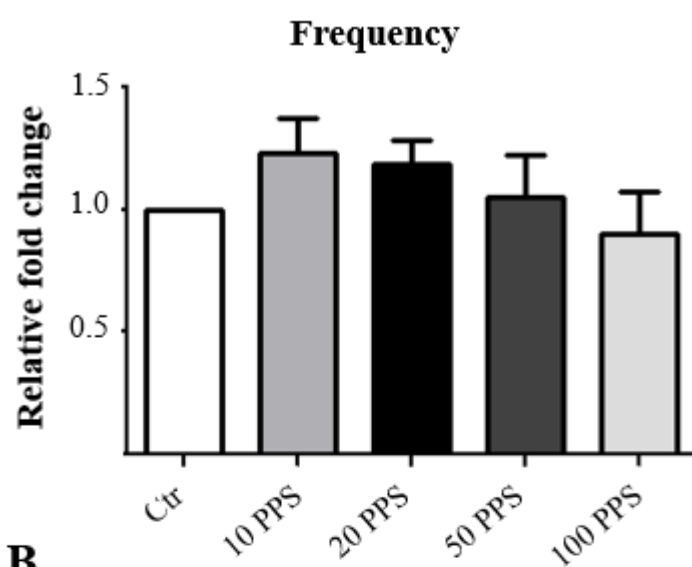**B**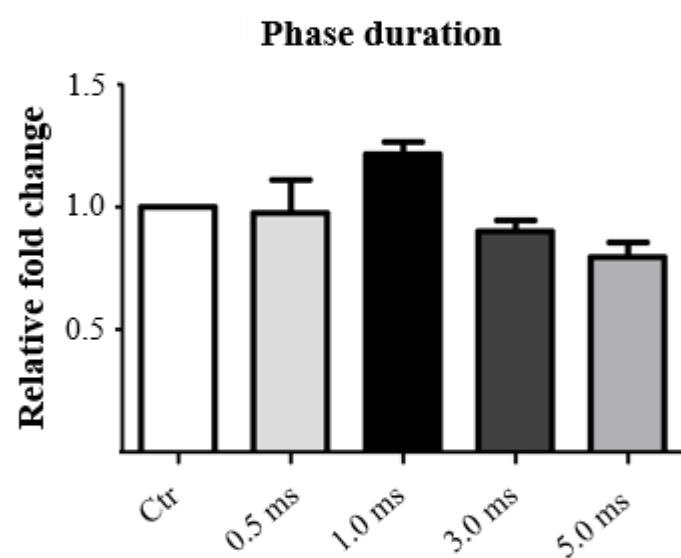**C**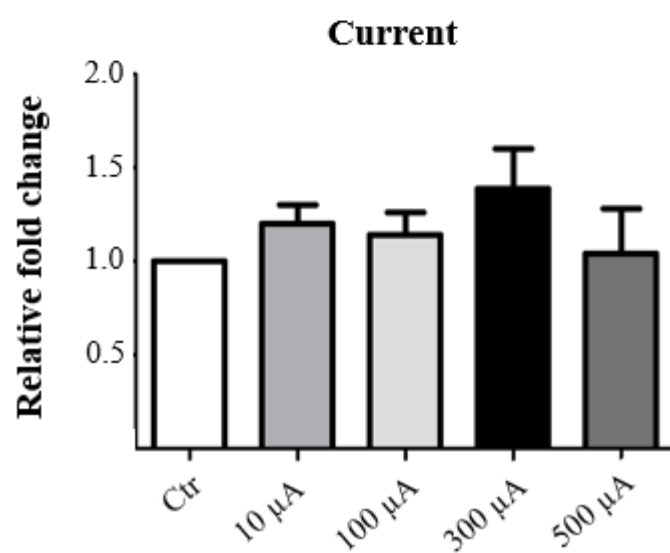

**Figure S1.** Impacts of ES frequency, duration, and current intensity on MC proliferation. **(A)** Relative changes in MC proliferation assessed by EdU incorporation assay, showing no significant differences under various PPS of ES at a rectangular waveform, 1 ms/phase duration, and 100  $\mu$ A current. **(B)** Changes in MC proliferation under various phase durations of ES with a fixed rectangular waveform, 20 PPS, and 100  $\mu$ A. **(C)** Changes in MC proliferation under various ES current with a rectangular waveform at 20 PPS and 1 ms phase duration. Value = means  $\pm$  S.E.M. (n = 5/group compared to controls by paired *t* tests).

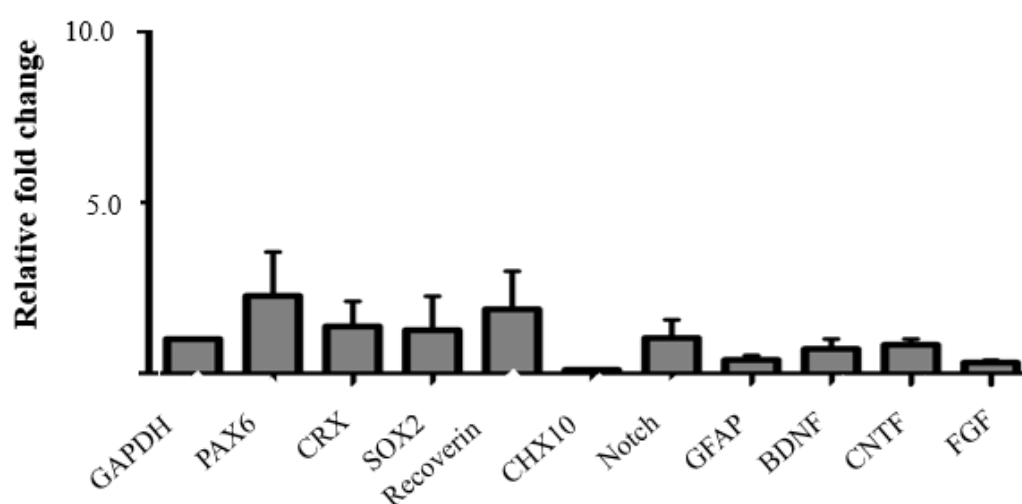

**Figure S2.** Impacts of ES frequency, duration and current intensity on MC proliferation. Relative fold changes of RT-PCR in progenitor cell markers after 15-minute of ES. Upregulation of several genes 48 hours after 15-minute ES treatment. The changes were non-significant.
